# Supplementary material for: The use of virtual reality and augmented reality in psychosocial rehabilitation for adults with neurodevelopmental disorders: A systematic review
Source: Frontiers journal article supplement (doi:10.3389/fpsyt.2022.1055204), 2022-12-14
Supplement: Data_Sheet_1.pdf [file Data_Sheet_1.pdf]

## Supplementary Material: Risk of Bias Assessments

**ROBINS-I (Non-Randomized Controlled Studies) Risk of Bias Domains**

|                                                 | B1                                                                                  | B2                                                                                  | B3                                                                                  | B4                                                                                  | B5                                                                                    | B6                                                                                    | B7                                                                                    |
|-------------------------------------------------|-------------------------------------------------------------------------------------|-------------------------------------------------------------------------------------|-------------------------------------------------------------------------------------|-------------------------------------------------------------------------------------|---------------------------------------------------------------------------------------|---------------------------------------------------------------------------------------|---------------------------------------------------------------------------------------|
| Adery et.al.<br>(2018)-serious risk             |    |    |    |    |    |    |    |
| Amado et al.<br>(2016) - critical risk          |    |    |    |    |    |    |    |
| Amaral et al<br>(2018) - serious risk           |    |    |    |    |    |    |    |
| Baker-Ericze<br>(2021) - serious risk           |    |    |    |    |    |    |    |
| Bozgeyikli et al<br>(2017) - critical risk      |    |    |    |    |    |    |    |
| Bridges et al<br>(2020) - serious risk          |   |   |   |   |   |   |   |
| Burke et al<br>(2018) - serious risk            |  |  |  |  |  |  |  |
| Burke et al<br>(2021) - moderate risk           |  |  |  |  |  |  |  |
| Chang et.al.<br>(2013)- critical risk           |  |  |  |  |  |  |  |
| Cox (2017) - serious risk                       |  |  |  |  |  |  |  |
| Dellazizzo et al<br>(2020) - serious risk       |  |  |  |  |  |  |  |
| de la Torre-Luque et.al.<br>(2017)-serious risk |  |  |  |  |  |  |  |
| Giachero et al<br>(2021)-serious risk           |  |  |  |  |  |  |  |
| Jacques et al<br>(2018)-critical risk           |  |  |  |  |  |  |  |
| Jeon et al<br>(2021)-serious risk               |  |  |  |  |  |  |  |
| Kandalaft et al<br>(2013)-serious risk          |  |  |  |  |  |  |  |

|                                         | B1                                                                                  | B2                                                                                  | B3                                                                                  | B4                                                                                  | B5                                                                                   | B6                                                                                    | B7                                                                                    |
|-----------------------------------------|-------------------------------------------------------------------------------------|-------------------------------------------------------------------------------------|-------------------------------------------------------------------------------------|-------------------------------------------------------------------------------------|--------------------------------------------------------------------------------------|---------------------------------------------------------------------------------------|---------------------------------------------------------------------------------------|
| Kuper et al. 2020-serious risk          |    |    |    |    |    |    |    |
| Maskey et al (2019)-serious risk        |    |    |    |    |    |    |    |
| Miller et al (2020)-critical risk       |    |    |    |    |    |    |    |
| Panerai et al (2018)-serious risk       |    |    |    |    |    |    |    |
| Rus-Calafell et al. (2013)-serious risk |    |    |    |    |    |    |    |
| Saiano et.al. (2015)-serious risk       |    |    |    |    |    |    |    |
| Simões et al (2018)-serious risk        |  |  |  |  |  |  |  |
| Smith et al. (2022)-moderate risk       |  |  |  |  |  |  |  |
| Sohn et al. (2016)-serious risk         |  |  |  |  |  |  |  |

#### Domains:

B1: Bias due to confounding

B2: Bias in selection of participants

B3: Bias in classification of interventions

B4: Bias due to deviations from intended interventions

B5: Bias due to missing data

B6: Bias in measurement of outcomes

B7: Bias in selection of the reported result

#### Level of Risk:

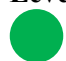

Low risk

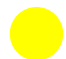

Moderate risk

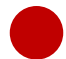

Serious risk

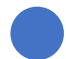

Critical risk

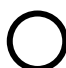

No information on which to base judgment about risk

## ROB-2 (Randomized Controlled Studies) Risk of Bias Domains

|                                                                                                                                                                                          | B1                                                                                  | B2                                                                                  | B3                                                                                  | B4                                                                                    | B5                                                                                    |
|------------------------------------------------------------------------------------------------------------------------------------------------------------------------------------------|-------------------------------------------------------------------------------------|-------------------------------------------------------------------------------------|-------------------------------------------------------------------------------------|---------------------------------------------------------------------------------------|---------------------------------------------------------------------------------------|
| Camera et.al. (2021)-some concerns                                                                                                                                                       |    |    |    |    |    |
| Du Sert et al (2018)-high risk                                                                                                                                                           |    |    |    |    |    |
| Humm et al. (2014)-high risk                                                                                                                                                             |    |    |    |    |    |
| Kumazaki et al. 2020-high risk                                                                                                                                                           |    |    |    |    |    |
| Pot-Kolder et.al. (2018)-some concerns                                                                                                                                                   |    |    |    |    |    |
| Smith et.al. (2014)-some concerns                                                                                                                                                        |    |    |    |    |    |
| Smith et al. 2015)-some concerns.<br><i>Brief Report: Vocational Outcomes for Young Adults with Autism Spectrum Disorders at Six Months After Virtual Reality Job Interview Training</i> |    |    |    |    |    |
| Smith et al. (2015)-high risk<br><i>Virtual Reality Job Interview Training and 6-Month Employment Outcomes for Individuals with Schizophrenia Seeking Employment.</i>                    |   |   |   |   |   |
| Smith et al. (2021)-some concerns                                                                                                                                                        |  |  |  |  |  |
| Strickland et.al. (2013)-some concerns                                                                                                                                                   |  |  |  |  |  |
| Tsang & Man (2013)-low risk                                                                                                                                                              |  |  |  |  |  |
| Vass et al. (2020)-low risk                                                                                                                                                              |  |  |  |  |  |
| White et al. (2016)-some concerns                                                                                                                                                        |  |  |  |  |  |

### Domains:

B1: Bias due to randomization

B2: Bias due to deviations from intended intervention

B3: Bias due to missing outcome data

B4: Bias due to measurement of outcome

B5: Bias due to selection of reported results

### Level of Risk:

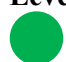

Low risk

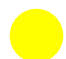

Some concerns

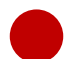

High risk
